# Supplementary material for: Thermokarst lake inception and development in syngenetic ice-wedge polygon terrain during a cooling climatic trend, Bylot Island (Nunavut), eastern Canadian Arctic
Source: Copernicus journal article supplement (doi:10.5194/tc-14-2607-2020), 2020-08-20

## **Plates (photographs) of the most abundant fossil diatoms found in a 109-cm long sediment core collected in June 2015 in Gull Lake, Bylot Island, Nunavut, Canada.**

### **5 Methods**

Fossil diatom analysis was conducted on 60 subsamples at varying interval: each cm for the top 12 cm, then each 2 cm towards core bottom. Diatoms slides were prepared and analyzed following Battarbee et al. (2001) and Bouchard et al. (2013). When possible, an average of 400 diatom valves were counted along transects using a Leica DMRX light microscope. Identification was carried out to the lowest taxonomic level possible (i.e., species or variety/morphotype) at a 1000 × magnification. Taxa names are given as they appeared originally in consulted floras. Photos of most of these taxa were taken with a Leica DFC490 camera (mounted on the microscope) and were used to prepare plates of the representative taxa (Fig. S3 below).

### **References**

Battarbee, R., Jones, V., Flower, R., Cameron, N., Bennion, H., Carvalho, L., and Juggins, S.: Diatoms, in: Tracking Environmental Change Using Lake Sediments. Volume 3: Terrestrial, Algal, and Siliceous Indicators, edited by: Smol, J., Birks, J., Last, W., Bradley, R., and Alverson, K., Developments in Paleoenviromental Research, 3, Springer Netherlands, 155-202, 2001.

Bouchard, F., Pienitz, R., Ortiz, J. D., Francus, P., and Laurion, I.: Palaeolimnological conditions inferred from fossil diatom assemblages and derivative spectral properties of sediments in thermokarst ponds of subarctic Quebec, Canada, Boreas, 42, 575-595, doi: 10.1111/bor.12000, 2013.

### **Next 4 pages:**

**Figure S3: Plates or photographs (1 to 4) of dominant diatom species found in sediments of Gull Lake, Bylot Island, Nunavut, Canada (1 plate/page).**

## Plate 1

*Tabellaria flocculosa*

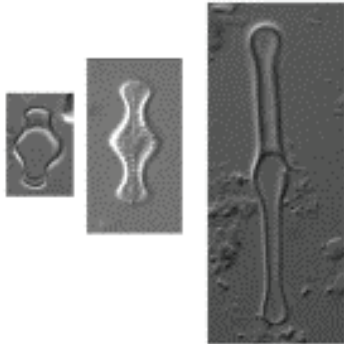

*Fragilaria capucina*

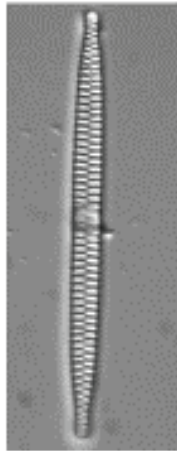

*Fragilaria perminuta*

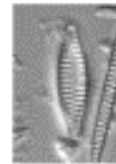

*Achnanthes minutissimum*

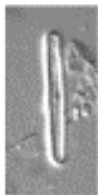

*Planothidium oestrupii*

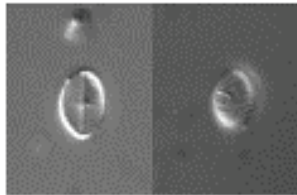

*Eunotia bilunaria*

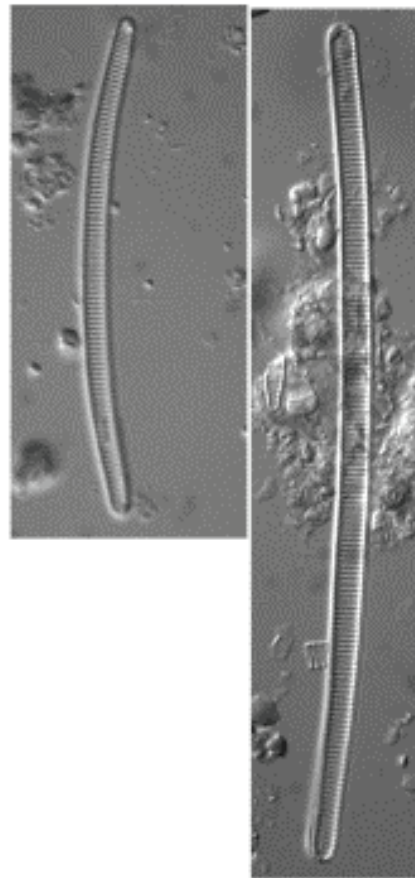

*Psammodictyon*  
cf. *seminulum*

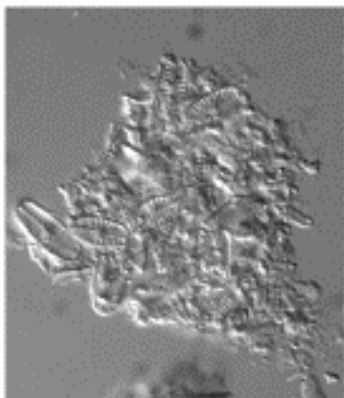

## Plate 2

*Caloneis fusus*

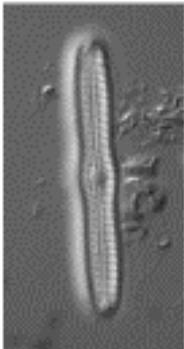

*Diploneis krameri*

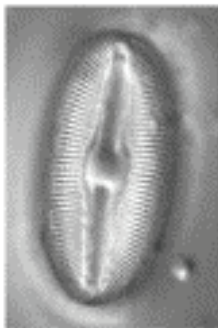

*Diatomella balfouriana*

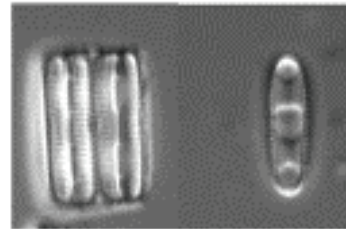

*Navicula cincta*

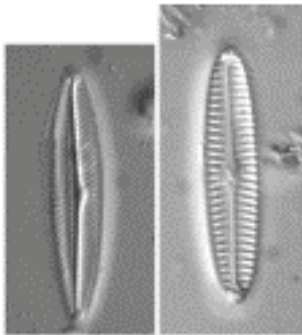

*Navicula cryptocephala*

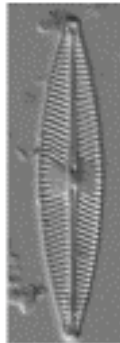

*Geissleria schoenfeldii*

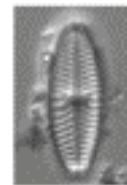

*Decussata placentula*

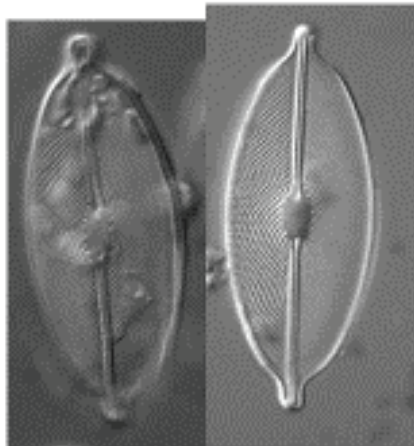

## Plate 3

*Encyonema elginense*

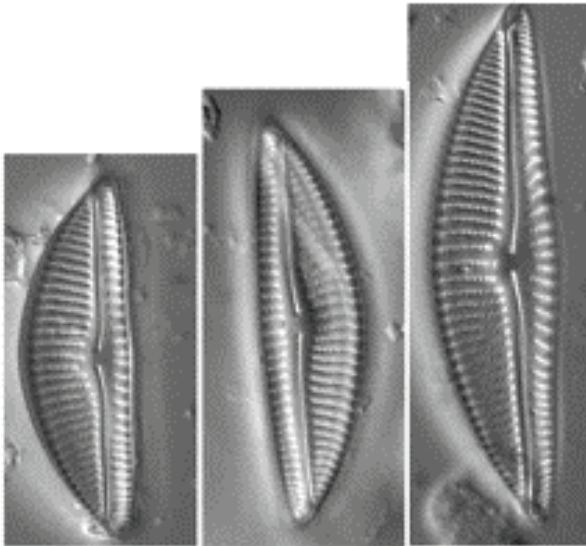

*Encyonema paucistriacum*

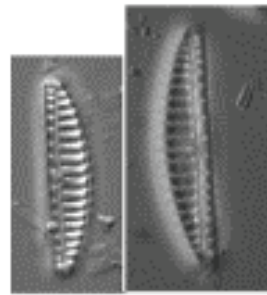

*Cymboplectura tynii*

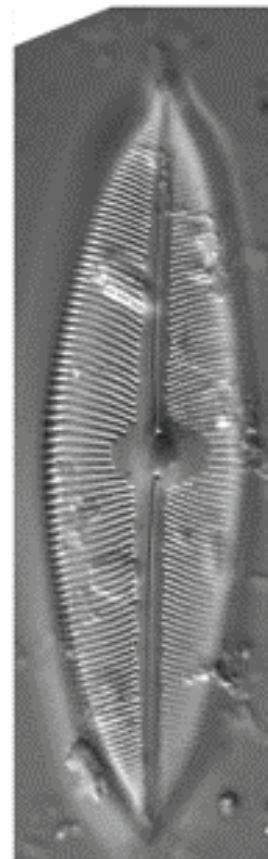

*Cymboplectura amphicephala*

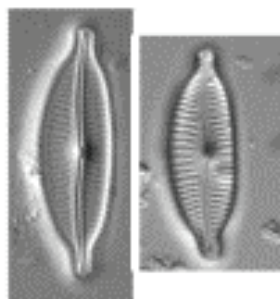

## Plate 4

*Gomphonema augustatum*

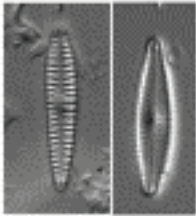

*Gomphonema distans*

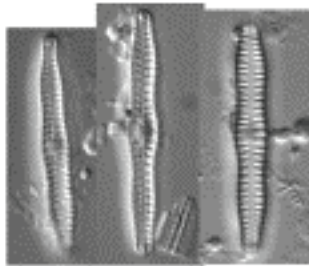

*Pinnularia sinistra*

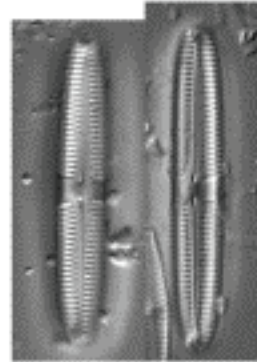

*Chameapinnularia sohenrensis*

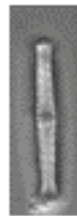

*Nitzschia dissipata*

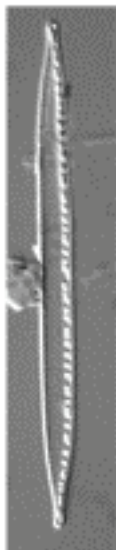

*Nitzschia vitrea*

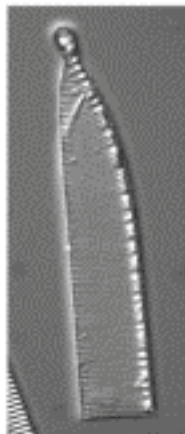

*Nitzschia perminuta*

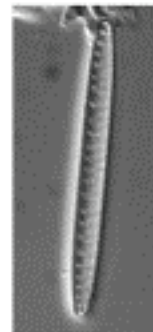

Supplement: Supplementary file 1 [file tc-14-2607-2020-supplement.zip › Bouchard et al SUPP/S2_GullLake_DiatomPlates.pdf]
