# Supplementary material for: Thermokarst lake inception and development in syngenetic ice-wedge polygon terrain during a cooling climatic trend, Bylot Island (Nunavut), eastern Canadian Arctic
Source: Copernicus journal article supplement (doi:10.5194/tc-14-2607-2020), 2020-08-20
Supplement: Supplementary file 1 [file tc-14-2607-2020-supplement.zip]

Archive with 12 entries (9 files):
- Bouchard et al SUPP/
- Bouchard et al SUPP/.DS_Store
- Bouchard et al SUPP/S2_GullLake_DiatomPlates.pdf
- Bouchard et al SUPP/S1_GullLake_CT-Scan.pdf
- Bouchard et al SUPP/S3_GullLake_TSensors.pdf
- __MACOSX/
- __MACOSX/Bouchard et al SUPP/
- __MACOSX/Bouchard et al SUPP/._.DS_Store
- __MACOSX/Bouchard et al SUPP/._S2_GullLake_DiatomPlates.pdf
- __MACOSX/Bouchard et al SUPP/._S1_GullLake_CT-Scan.pdf
- __MACOSX/Bouchard et al SUPP/._S3_GullLake_TSensors.pdf
- tc-14-2607-2020-supplement-title-page.pdf
