# Supplementary material for: Thermokarst lake inception and development in syngenetic ice-wedge polygon terrain during a cooling climatic trend, Bylot Island (Nunavut), eastern Canadian Arctic
Source: Copernicus journal article supplement (doi:10.5194/tc-14-2607-2020), 2020-08-20
Supplement: Supplementary file 1 [file tc-14-2607-2020-supplement.zip › Bouchard et al SUPP/S3_GullLake_TSensors.pdf]

# Lake-bottom temperatures recorded at the bottom of a thermokarst lake (2014-2015), Bylot Island, Nunavut, Canada

## Methods

- 5 Two temperature sensors (Onset Hobo) were deployed at the bottom of Gull Lake from 11 July 2014 to 06 July 2015. One sensor was put in the shallow peripheral platform (shelf) and the other in the deeper lake center (Fig. S3).

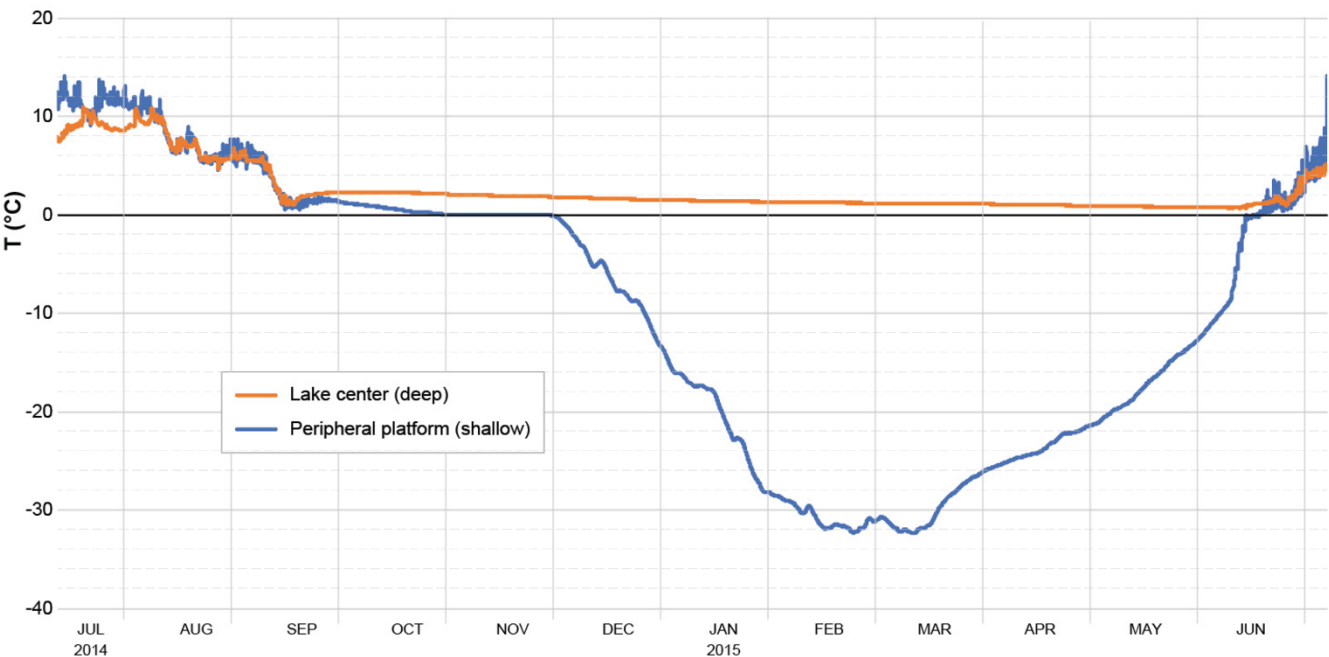

Figure S4: Lake-water temperatures recorded at the bottom of a thermokarst lake (2014-2015), Bylot Island, Nunavut, Canada.
