# Supplementary material for: Thermokarst lake inception and development in syngenetic ice-wedge polygon terrain during a cooling climatic trend, Bylot Island (Nunavut), eastern Canadian Arctic
Source: Copernicus journal article supplement (doi:10.5194/tc-14-2607-2020), 2020-08-20
Supplement: Supplementary file 1 [file tc-14-2607-2020-supplement.zip › tc-14-2607-2020-supplement-title-page.pdf]

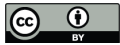

## *Supplement of*

# **Thermokarst lake inception and development in syngenetic ice-wedge polygon terrain during a cooling climatic trend, Bylot Island (Nunavut), eastern Canadian Arctic**

**Frédéric Bouchard et al.**

*Correspondence to:* Frédéric Bouchard (frederic.bouchard@u-psud.fr)

- tc-14-2607-2020-supplement-title-page.pdf
- Bouchard et al SUPP
  - .DS\_Store
  - S1\_GullLake\_CT-Scan.pdf
  - S2\_GullLake\_DiatomPlates.pdf
  - S3\_GullLake\_TSensors.pdf
- \_\_MACOSX
  - Bouchard et al SUPP
    - \* .DS\_Store
    - \* .S1\_GullLake\_CT-Scan.pdf
    - \* .S2\_GullLake\_DiatomPlates.pdf
    - \* .S3\_GullLake\_TSensors.pdf

The copyright of individual parts of the supplement might differ from the CC BY 4.0 License.
